# Supplementary material for: Unity and disunity in evolutionary sciences: process-based analogies open common research avenues for biology and linguistics
Source: PubMed Central journal article supplement (PMC4992195; doi:10.1186/s13062-016-0145-2), 2016-08-20
Supplement: 13062_2016_145_MOESM1_ESM.pdf [file 13062_2016_145_MOESM1_ESM.pdf]

Supplementary Material and Source Code Accompanying the Paper “Unity and disunity in evolutionary sciences”

All data can be downloaded from GitHub at:

- <https://github.com/lingpy/process-based-analogies>

Additionally, an official release with a DOI is available at Zenodo:

- <https://zenodo.org/badge/latestdoi/5137/lingpy/process-based-analogies>
